# Supplementary material for: Facile cyclization of sodium aminodiboranate to construct a boron–nitrogen–hydrogen ring
Source: Royal Society of Chemistry journal article supplement (doi:10.1039/d0dt03398g), 2020-01-01
Supplement: d0dt03398g1.pdf [file d0dt03398g1.pdf]

## Supporting Information

### Facile Cyclization of Sodium Aminodiboranate to Construct Boron–nitrogen–hydrogen Ring

*Huizhen Li,<sup>\*a,b</sup> Mingyue Ju,<sup>†b</sup> Jiaxin Kang,<sup>†b</sup> Ai-Ju Zhou,<sup>a</sup> Hong-Yu Guan,<sup>\*a</sup> Douglas J. Austin,<sup>c</sup> and Yanfeng Yue<sup>c</sup>*

<sup>a</sup>School of Chemistry and Chemical Engineering, Guangzhou University, Guangzhou, Guangdong 510006, China

<sup>b</sup>Henan Key Laboratory of Boron Chemistry and Advanced Energy Materials, School of Chemistry and Chemical Engineering, Henan Normal University, Xinxiang, Henan 453007, China

<sup>c</sup>Department of Biology, Geology, and Physical Science, Sul Ross State University, Alpine, TX, USA

This Electronic Supplementary Information replaces the version originally published on 31<sup>st</sup> October 2020, which contained errors in the <sup>11</sup>B NMR data in Section 1.

## Table of Contents

|                                                                                                                                                                                                                                                                                                                                                                                                              |           |
|--------------------------------------------------------------------------------------------------------------------------------------------------------------------------------------------------------------------------------------------------------------------------------------------------------------------------------------------------------------------------------------------------------------|-----------|
| <b>1. General Experimental Details .....</b>                                                                                                                                                                                                                                                                                                                                                                 | <b>3</b>  |
| <b>2. Computational method.....</b>                                                                                                                                                                                                                                                                                                                                                                          | <b>4</b>  |
| <b>3. Supporting Results.....</b>                                                                                                                                                                                                                                                                                                                                                                            | <b>5</b>  |
| Figure S1a. <sup>11</sup> B NMR spectrum of ADB in the solution mixture of <b>1</b> + HCl (adding 1 equiv. HCl solution to <b>1</b> solution) in THF at room temperature. ....                                                                                                                                                                                                                               | 5         |
| Figure S1b. <sup>1</sup> H NMR spectrum of the product H <sub>2</sub> in <i>d</i> <sub>8</sub> -Toluene. ....                                                                                                                                                                                                                                                                                                | 5         |
| Figure S1c. XRD spectrum of the product NaCl. ....                                                                                                                                                                                                                                                                                                                                                           | 6         |
| Figure S1d. <sup>11</sup> B NMR spectrum of the solution mixture of <b>1</b> + HCl (adding 1.5 equiv. HCl solution to <b>1</b> solution) in THF at room temperature. ....                                                                                                                                                                                                                                    | 6         |
| Figure S1e. <sup>11</sup> B NMR spectrum of the solution mixture of <b>1</b> + HCl (adding <b>1</b> solution to 1 equiv. HCl solution) in THF at room temperature ....                                                                                                                                                                                                                                       | 6         |
| Figure S2. <sup>11</sup> B NMR spectrum of the solution mixture of <b>1</b> + HCl in THF at different temperature. a) RT, b) 0 °C, c) -20 °C .....                                                                                                                                                                                                                                                           | 7         |
| Figure S3. <sup>11</sup> B NMR spectrum of the solution mixture of <b>1</b> + HCl in different solvent at room temperature. a) THF, b) Et <sub>2</sub> O, c) DME.....                                                                                                                                                                                                                                        | 7         |
| Figure S4. <sup>11</sup> B NMR spectrum of MeADB in the solution mixture of <b>2</b> + HCl (adding 1 equiv. HCl solution to <b>2</b> solution) in THF at 0 °C. ....                                                                                                                                                                                                                                          | 8         |
| Figure S5. <sup>11</sup> B NMR spectrum of Me <sub>2</sub> ADB in the solution mixture of <b>3</b> + HCl (adding 1 equiv. HCl solution to <b>3</b> solution) in THF at 0 °C. ....                                                                                                                                                                                                                            | 9         |
| Figure S6 The optimized geometries for [NH <sub>2</sub> (BH <sub>3</sub> ) <sub>2</sub> ] <sup>-</sup> , ADB and H <sub>2</sub> . Colors: N, blue; B, pink; H, white (bond length is shown in Å, bond angle shown in °) .....                                                                                                                                                                                | 9         |
| Figure S7 The optimized geometries for all the species of the [NH <sub>2</sub> (BH <sub>3</sub> ) <sub>2</sub> ] <sup>-</sup> + HCl reactions. Colors: N, blue; B, pink; Cl, green; H, white (bond length is shown in Å, bond angle shown in °).....                                                                                                                                                         | 10        |
| Figure S8 The nature population analysis of reactant complexes and transition states of the [NH <sub>2</sub> (BH <sub>3</sub> ) <sub>2</sub> ] <sup>-</sup> + HCl reactions. ....                                                                                                                                                                                                                            | 10        |
| Table S1 Calculated zero point energies (ZPE), relative energies (Δ( <i>E</i> + ZPE) kcal·mol <sup>-1</sup> ), enthalpies (Δ <i>H</i> kcal·mol <sup>-1</sup> ), gibbs free energies (Δ <i>G</i> kcal·mol <sup>-1</sup> ) and entropy ( <i>S</i> cal·mol <sup>-1</sup> ) of the reaction [NH <sub>2</sub> (BH <sub>3</sub> ) <sub>2</sub> ] <sup>-</sup> + HCl → ADB + H <sub>2</sub> + Cl <sup>-</sup> ..... | 11        |
| <b>4. Cartesian coordinates and vibrational frequencies on the studied models .....</b>                                                                                                                                                                                                                                                                                                                      | <b>11</b> |

## 1. General Experimental Details

**General Procedures:** All manipulations were carried out by using Schlenk-line techniques or in a glovebox filled with high-purity nitrogen.  $^{11}\text{B}$  NMR spectra were obtained at 192 MHz and externally referenced to  $\text{BF}_3\cdot\text{OEt}_2$  in  $\text{C}_6\text{D}_6$  ( $\delta = 0.00$  ppm).  $^1\text{H}$  NMR spectra were obtained at 600 MHz and externally referenced to TMS in  $d_6$ -Benzene ( $\delta = 0.00$  ppm). X-ray diffraction data was collected on a Rigaku D/max 2500 diffractometer by using Cu-K $\alpha$  radiation ( $\lambda = 0.1542$  nm, 40 kV, 100 mA).  $\text{Na}[\text{NR}_1\text{R}_2(\text{BH}_3)_2]$  ( $\text{R}_1, \text{R}_2 = \text{H}, \text{Me}$ ) were purchased from United Boron (Zhengzhou) Energy Materials S&T LLC. The  $\text{HCl}\cdot\text{Et}_2\text{O}$  solution was prepared by passing dried HCl gas into  $\text{Et}_2\text{O}$  and titrated by 0.1 M standard KOH solution. The solvents (THF, DME,  $\text{Et}_2\text{O}$ ) were dried over sodium/benzophenone and freshly distilled prior to use.

### Reactions of $\text{Na}[\text{NH}_2(\text{BH}_3)_2]$ with $\text{HCl}\cdot\text{Et}_2\text{O}$ :

A very rapid reaction was initiated when  $\text{HCl}\cdot\text{Et}_2\text{O}$  solution (1.785 mL, 2 mmol) was injected into the flask filled with  $\text{Na}[\text{NH}_2(\text{BH}_3)_2]$  (0.134 g, 2 mmol) at 0 °C. A white precipitate and a large amount of  $\text{H}_2$  (23.16 mL, 1.035 mmol, Figure S1b) formed immediately and the reaction was followed by the  $^{11}\text{B}$  NMR. ADB was purified by fractionally condensation with high yield (75%, Table 1, entry 7, Figure S1a).<sup>1-2</sup> The white solid was dried under a dynamic vacuum and further confirmed to be NaCl (0.116g, 1.992 mmol, Figure S1c).  $^{11}\text{B}$  NMR (192 MHz,  $\delta$ ) -26.8 (br).  $^1\text{H}$  NMR ( $d_6$ -Benzene, 600 MHz,  $\delta$ ) 4.2 (s,  $\text{H}_2$ ). XRD(2 $\theta$ ): 27.1, 31.4, 45.0, 53.4, 56.0, 65.8, 74.7. The reaction also can occur at room temperature/-20 °C in THF or DME/ $\text{Et}_2\text{O}$  with similar results (Figures S2, 3).

### Reactions of $\text{Na}[\text{MeNH}(\text{BH}_3)_2]$ (2) with $\text{HCl}\cdot\text{Et}_2\text{O}$

A very rapid reaction was initiated when  $\text{HCl}\cdot\text{Et}_2\text{O}$  solution (0.4463 mL, 0.5 mmol) was injected into the flask filled with  $\text{Na}[\text{MeNH}(\text{BH}_3)_2]$  (0.0405 g, 0.5 mmol) at 0 °C. A white precipitate and a large amount of  $\text{H}_2$  formed immediately and the reaction was followed by the  $^{11}\text{B}$  NMR.  $\text{NMeB}_2\text{H}_6$  was purified by fractionally condensation (yield, 38%, Table 1, entry 6, Figure S4).<sup>1-2</sup> The white solid was dried under a dynamic vacuum and further confirmed to be NaCl.  $^{11}\text{B}$  NMR (192 MHz,  $\delta$ ) -22.15 (br, sextet).  $^1\text{H}$  NMR ( $d_6$ -Benzene, 600 MHz):  $\delta$  4.2 (s,  $\text{H}_2$ ). XRD (2 $\theta$ , NaCl): 27.4, 31.7, 45.2, 53.5, 56.1, 65.6, 74.5.

### Reactions of $\text{Na}[\text{Me}_2\text{N}(\text{BH}_3)_2]$ (3) with $\text{HCl}\cdot\text{Et}_2\text{O}$

A very rapid reaction was initiated when  $\text{HCl}\cdot\text{Et}_2\text{O}$  solution (0.4463 mL, 0.5 mmol) was injected into the flask filled with  $\text{Na}[\text{Me}_2\text{N}(\text{BH}_3)_2]$  (0.0475 g, 0.5 mmol) at 0 °C. A white precipitate and a large amount of  $\text{H}_2$  formed immediately and the reaction was followed by the  $^{11}\text{B}$  NMR.  $\text{NMe}_2\text{B}_2\text{H}_5$  was purified by fractionally condensation (yield, 49%, Table 1, entry 7, Figure S5).<sup>1-2</sup> The white solid was dried under a dynamic vacuum and further confirmed to be NaCl.  $^{11}\text{B}$  NMR (192 MHz,  $\delta$ ) -17.48 (br, sextet).  $^1\text{H}$  NMR ( $d_6$ -Benzene, 600 MHz):  $\delta$  4.2 (s,  $\text{H}_2$ ). XRD (2 $\theta$ , NaCl): 26.9, 31.5, 45.6, 53.1, 56.2, 65.4, 74.2.

## 2. Computational method

All density functional theory (DFT) calculations were performed using the Gaussian 09W program.<sup>3</sup> The geometries, natural population analysis (NPA) of all the species are calculated at M06-2X/6-311++G(d,p) level of theory. As well as the corresponding frequencies of the optimized geometries are computed at the same level to prove the characteristics of the transition states with one imaginary frequency (Figures S6-8), and the stationary points without imaginary frequency. To get more accurate energies, the single point energy of all the species are calculated at CCSD(T)/aug-cc-pVDZ level of theory with SMD solvent model in THF. The intrinsic reaction coordinate (IRC)<sup>4-6</sup> theory are used to confirm that the transition states really connect to minima along the reaction path. The rate constants are calculated by the conventional transition state theory (TST)<sup>7-9</sup> with Winger tunneling correction and performed using the VKLab<sup>10</sup> program coupled with the steady state approximation. The calculated structure of ADB is consistent with the microwave structure.<sup>11</sup> As presented in Figures S6-8, the geometries are in good accordance with the experiment. Otherwise, the N-H bond distance is shorter and the B- $\mu$ H bond distance is longer by 0.008 and 0.014 Å, respectively. Furthermore, the dipole moment (2.67 D) is calculated at the M06-2X/dft2-T2VPD level of theory, which is same with the measured value of 2.67 D.<sup>11</sup>

## References

- (1) H. Li, N. Ma, W. Meng, J. Gallucci, Y. Qiu, S. Li, Q. Zhao, J. Zhang, J.-C. Zhao, X. Chen, *J. Am. Chem. Soc.* **2015**, *137*, 12406.
- (2) X. Chen, J.-C. Zhao, S. G. Shore, *J. Am. Chem. Soc.* **2010**, *132*, 10658.
- (3) M. J. Frisch, G. W. Trucks, H. B. Schlegel, et al. Gaussian 09, Revision D.01; Gaussian, Inc.: Wallingford, CT, **2009**.
- (4) K. Fukui, *Acc. Chem. Res.*, **1981**, *14(12)*: 363.
- (5) M. Page, Jr J. W. McIver, *J. Chem. Phys.* **1988**, *88(2)*: 922.
- (6) C. Gonzalez, H. B. Schlegel, *J. Chem. Phys.* **1989**, *90(4)*: 2154.
- (7) B. C. Garrett, D. G. Truhlar, *J. Chem. Phys.* **1979**, *70*, 1593.
- (8) B. C. Garrett, D. G. Truhlar, *J. Am. Chem. Soc.* **1979**, *101*, 4534.
- (9) B. C. Garrett, D. G. Truhlar, R. S. Grev, A. W. Magnuson, *J. Phys. Chem.* **1980**, *84*, 1730.
- (10) S. W. Zhang, N. T. Truong, VKLab version 1.0, University of Utah, Salt Lake City, **2001**.
- (11) A. B. Burg, J. F. Liebman, A. Greenberg, *Advances in boron and the boranes*, VCH: New York. **1988**. p417.

## 3. Supporting Results

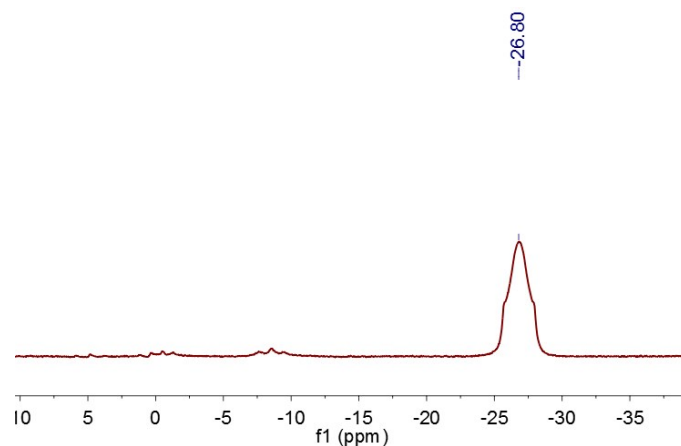

Figure S1a.  $^{11}\text{B}$  NMR spectrum of ADB in the solution mixture of **1** + HCl (adding 1 equiv. HCl solution to **1** solution) in THF at room temperature.

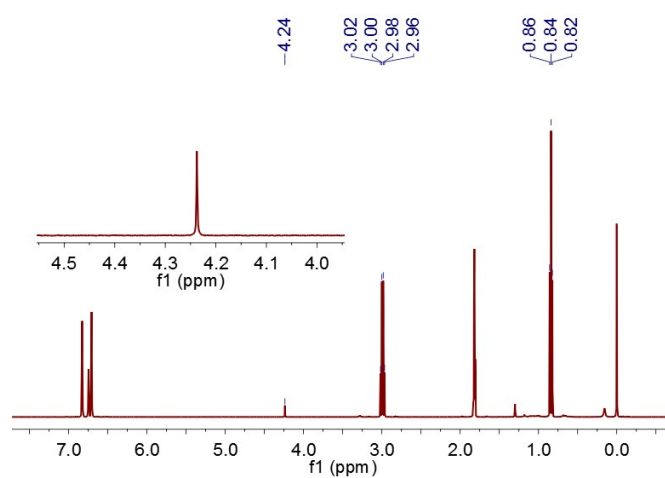

Figure S1b.  $^1\text{H}$  NMR spectrum of the product  $\text{H}_2$  in  $d_8$ -Toluene.

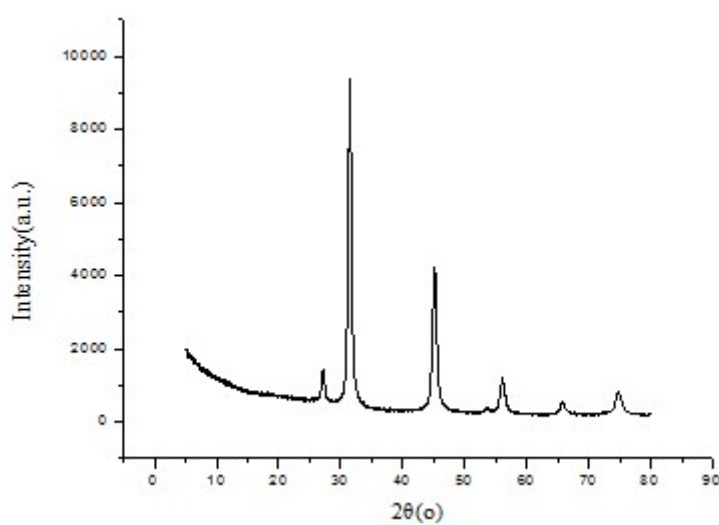

Figure S1c. XRD spectrum of the product NaCl.

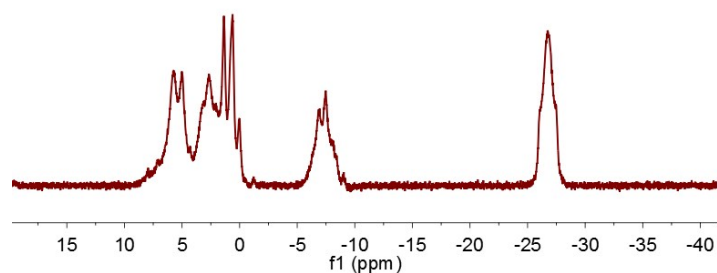

Figure S1d.  $^{11}\text{B}$  NMR spectrum of the solution mixture of **1** + HCl (adding 1.5 equiv. HCl solution to **1** solution) in THF at room temperature.

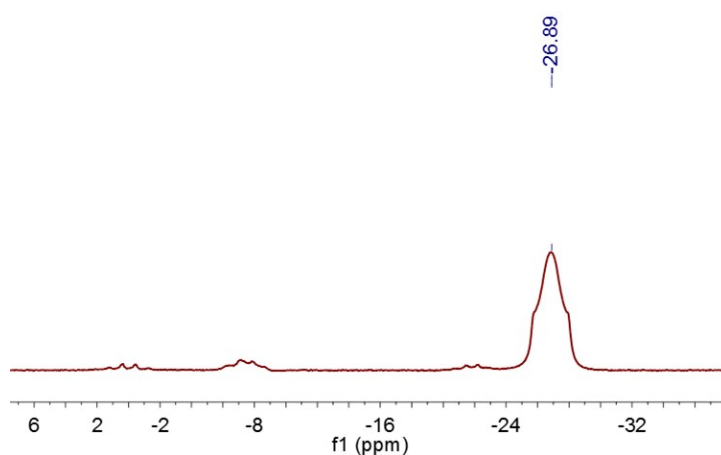

Figure S1e.  $^{11}\text{B}$  NMR spectrum of the solution mixture of **1** + HCl (adding **1** solution to 1 equiv. HCl solution) in THF at room temperature.

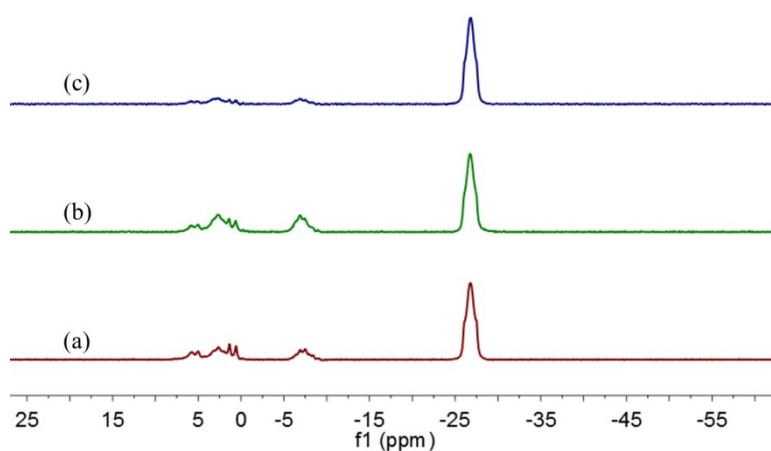

Figure S2.  $^{11}\text{B}$  NMR spectrum of the solution mixture of **1** + HCl in THF at different temperature. a) RT, b) 0 °C, c) -20 °C

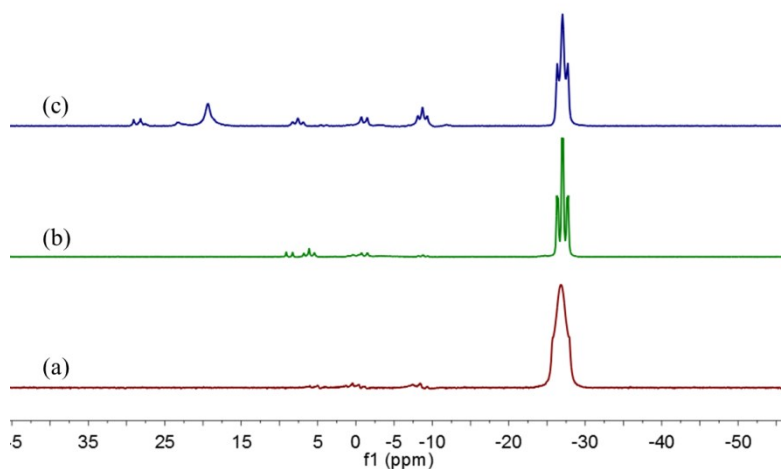

Figure S3.  $^{11}\text{B}$ NMR spectrum of the solution mixture of **1** + HCl in different solvent at room temperature. a) THF, b)  $\text{Et}_2\text{O}$ , c) DME.

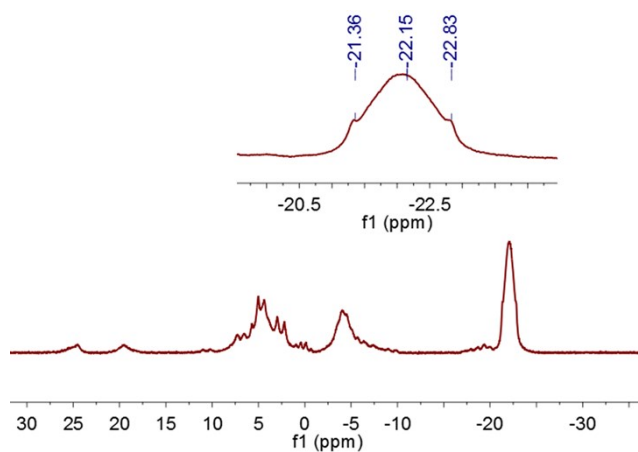

Figure S4.  $^{11}\text{B}$  NMR spectrum of MeADB in the solution mixture of **2** + HCl (adding 1 equiv. HCl solution to **2** solution) in THF at  $0\text{ }^\circ\text{C}$ .

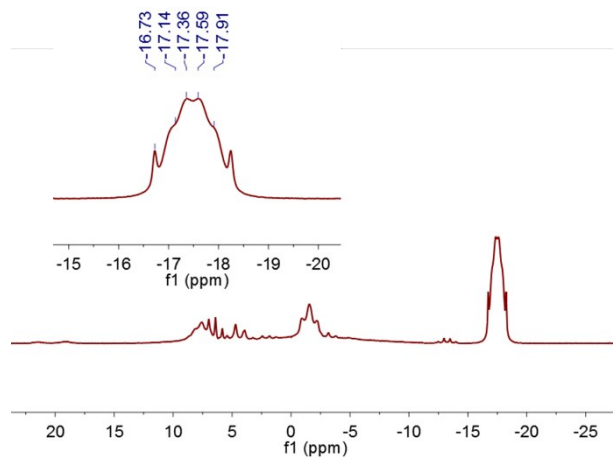

Figure S5.  $^{11}\text{B}$  NMR spectrum of  $\text{Me}_2\text{ADB}$  in the solution mixture of **3** + HCl (adding 1 equiv. HCl solution to **3** solution) in THF at  $0\text{ }^\circ\text{C}$ .

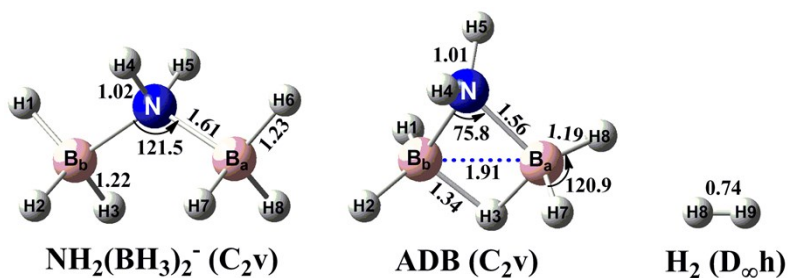

Figure S6 The optimized geometries for  $[\text{NH}_2(\text{BH}_3)_2]^-$ , ADB and  $\text{H}_2$ . Colors: N, blue; B, pink; H, white (bond length is shown in  $\text{\AA}$ , bond angle shown in  $^\circ$ )



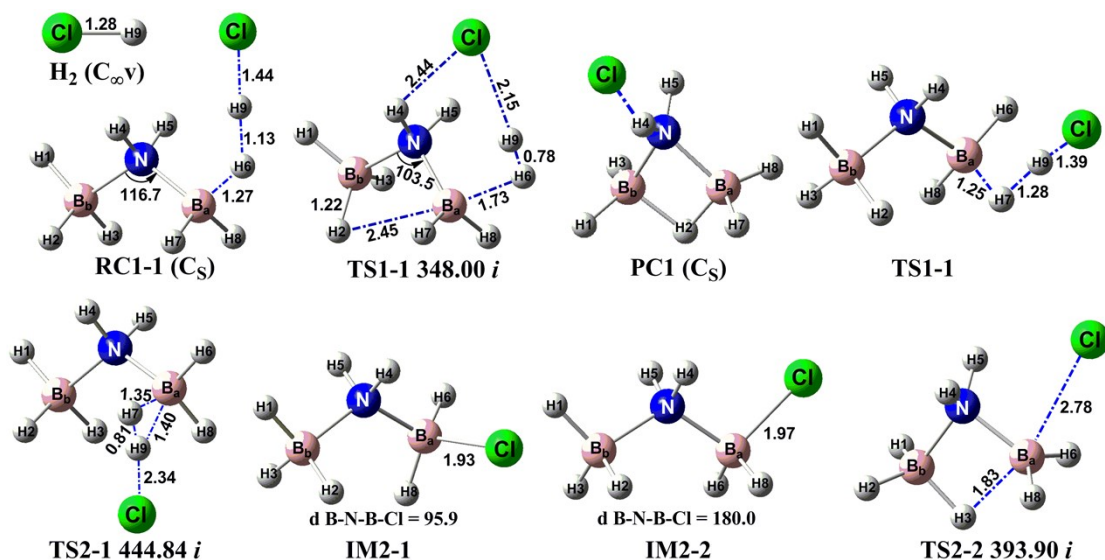

Figure S7 The optimized geometries for all the species of the  $[\text{NH}_2(\text{BH}_3)_2]^- + \text{HCl}$  reactions. Colors: N, blue; B, pink; Cl, green; H, white (bond length is shown in Å, bond angle shown in  $^\circ$ ).

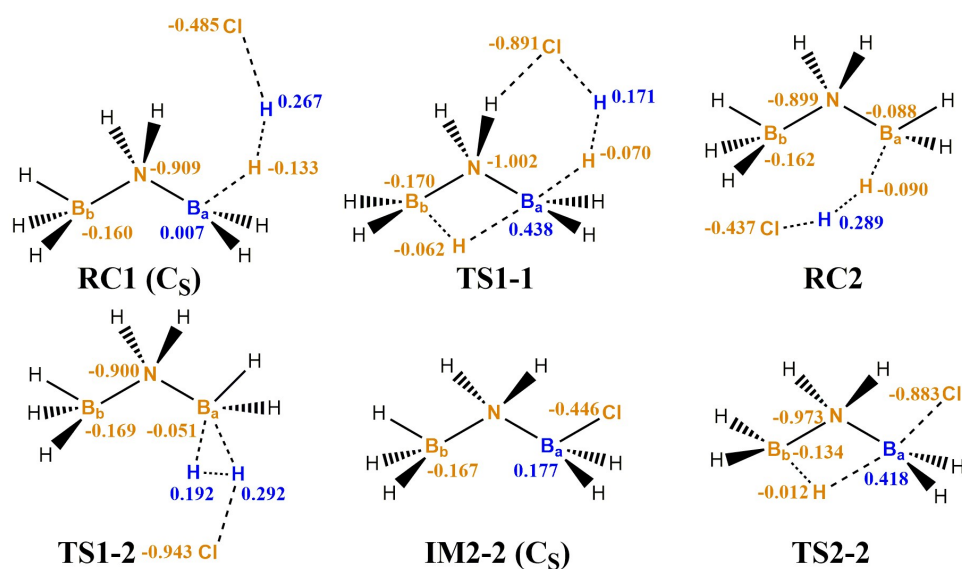

Figure S8 The natural population analysis of reactant complexes and transition states of the  $[\text{NH}_2(\text{BH}_3)_2]^- + \text{HCl}$  reactions.

**Table S1** Calculated zero point energies (ZPE), relative energies ( $\Delta(E + \text{ZPE})$  kcal·mol<sup>-1</sup>), enthalpies ( $\Delta H$  kcal·mol<sup>-1</sup>), gibbs free energies ( $\Delta G$  kcal·mol<sup>-1</sup>) and entropy ( $S$  cal·mol<sup>-1</sup>) of the reaction  $[\text{NH}_2(\text{BH}_3)_2]^- + \text{HCl} \rightarrow \text{ADB} + \text{H}_2 + \text{Cl}^-$

| Species                                       | ZPE   | $\Delta E$ | $\Delta(E+\text{ZPE})$ | $\Delta H$ | $\Delta G$ | S      |
|-----------------------------------------------|-------|------------|------------------------|------------|------------|--------|
| $[\text{NH}_2(\text{BH}_3)_2]^- + \text{HCl}$ | 60.20 | 0.00       | 0.00                   | 0.00       | 0.00       | 112.78 |
| RC1                                           | 61.64 | -3.21      | -1.77                  | -2.52      | 5.84       | 84.75  |
| TS1-1                                         | 61.53 | 1.31       | 2.64                   | 2.00       | 10.46      | 84.41  |
| PC1 + H <sub>2</sub>                          | 59.31 | -15.29     | -16.18                 | -15.66     | -14.54     | 77.90  |
| RC2                                           | 61.55 | -4.80      | -3.45                  | -4.28      | 4.51       | 83.29  |
| TS1-2                                         | 63.11 | 5.13       | 8.04                   | 7.19       | 15.88      | 83.63  |
| IM1-2 + H <sub>2</sub>                        | 58.71 | -16.68     | -18.17                 | -17.64     | -16.38     | 77.43  |
| IM2-2 + H <sub>2</sub>                        | 58.78 | -19.04     | -20.46                 | -19.91     | -18.35     | 76.42  |
| TS2-2 + H <sub>2</sub>                        | 58.35 | -3.66      | -5.51                  | -5.00      | -3.57      | 76.87  |
| ADB + H <sub>2</sub> + Cl <sup>-</sup>        | 59.47 | -9.09      | -9.81                  | -9.06      | -13.92     | 129.06 |

#### 4. Cartesian coordinates and vibrational frequencies on the studied models

##### $[\text{NH}_2(\text{BH}_3)_2]^-$

###### Cartesian coordinates

|   |             |             |             |
|---|-------------|-------------|-------------|
| B | 1.40427600  | -0.29218800 | -0.00001800 |
| H | 1.45259200  | -0.97257100 | -1.01179500 |
| H | 2.29650300  | 0.55850800  | 0.00011600  |
| B | -1.40432900 | -0.29225100 | -0.00004000 |
| H | -1.45260700 | -0.97241700 | 1.01183600  |
| H | -1.45258700 | -0.97274600 | -1.01172000 |
| H | 1.45234400  | -0.97300400 | 1.01147300  |
| N | 0.00002600  | 0.49449700  | -0.00004200 |
| H | 0.00021900  | 1.11653000  | 0.80735700  |
| H | -0.00004800 | 1.11767000  | -0.80656200 |
| H | -2.29632900 | 0.55874800  | -0.00011900 |

###### Vibrational frequencies

|           |           |           |
|-----------|-----------|-----------|
| 155.4854  | 236.9410  | 280.7759  |
| 576.7250  | 695.5078  | 799.2926  |
| 818.0507  | 885.5216  | 1026.9020 |
| 1070.6064 | 1184.8017 | 1196.6696 |
| 1208.7228 | 1211.5935 | 1226.1517 |
| 1226.1901 | 1227.5819 | 1228.6904 |
| 1657.7065 | 2379.4123 | 2393.3151 |
| 2455.8671 | 2473.0802 | 2483.2709 |
| 2497.9449 | 3486.9113 | 3558.2377 |

##### The reaction of $[\text{NH}_2(\text{BH}_3)_2]^- + \text{HCl}$

###### Complex (RC1)

###### Cartesian coordination

|    |             |             |             |
|----|-------------|-------------|-------------|
| B  | 0.80856100  | 1.36946300  | 0.22184400  |
| H  | 1.69657800  | 1.93782400  | 0.81641100  |
| H  | 0.21464800  | 2.08855800  | -0.56399500 |
| B  | 2.23080400  | -0.99357400 | 0.31174500  |
| H  | 1.50837700  | -1.40565600 | 1.20203100  |
| H  | 3.21794200  | -0.42406800 | 0.74516200  |
| H  | 0.01274500  | 0.95426800  | 1.09456500  |
| N  | 1.38027500  | 0.09630300  | -0.52713100 |
| H  | 0.60849300  | -0.39133700 | -0.98592000 |
| H  | 1.96920700  | 0.42780800  | -1.28997400 |
| H  | 2.53684600  | -1.88806400 | -0.47085400 |
| Cl | -2.09607000 | -0.25120000 | -0.00184300 |
| H  | -0.99039400 | 0.41749700  | 0.50586800  |

###### Vibrational frequencies

|          |           |           |
|----------|-----------|-----------|
| 54.4933  | 102.2783  | 145.1856  |
| 208.7867 | 249.5628  | 403.9567  |
| 609.2092 | 719.2137  | 811.7023  |
| 818.2570 | 845.8907  | 915.1127  |
| 938.8328 | 1001.7038 | 1068.8752 |

|           |           |           |    |             |             |             |
|-----------|-----------|-----------|----|-------------|-------------|-------------|
| 1130.4702 | 1192.7879 | 1196.9898 | N  | -0.86689300 | 0.00033900  | 0.41816500  |
| 1214.7630 | 1215.6399 | 1232.2974 | H  | 0.11092800  | 0.00059700  | 0.03615800  |
| 1238.5800 | 1310.4885 | 1480.4633 | H  | -0.80097400 | 0.00048800  | 1.42870500  |
| 1664.0368 | 2129.6320 | 2435.9723 | H  | -1.57560400 | -1.53153700 | 1.16917800  |
| 2489.1732 | 2516.9202 | 2559.7038 | Cl | 2.17927700  | 0.00005000  | -0.05201900 |
| 2616.2136 | 3488.6287 | 3556.2643 |    |             |             |             |

### Vibrational frequencies

|           |           |           |
|-----------|-----------|-----------|
| 91.7835   | 98.6325   | 200.0351  |
| 349.6660  | 659.4351  | 727.8027  |
| 757.0251  | 794.0867  | 926.6960  |
| 941.1925  | 972.6072  | 1050.7916 |
| 1084.6406 | 1124.2028 | 1160.6586 |
| 1196.6034 | 1220.5099 | 1237.6412 |
| 1674.2465 | 1715.4779 | 1994.7341 |
| 2611.8688 | 2626.2559 | 2702.7629 |
| 2712.0955 | 3039.6733 | 3625.0033 |

### TS1-1

#### Cartesian coordination

|    |             |             |             |
|----|-------------|-------------|-------------|
| B  | -1.15811700 | -1.25788300 | 0.12147100  |
| H  | -1.72188100 | -1.91677200 | -0.69944100 |
| H  | 0.31888200  | -2.02725100 | -0.37806200 |
| B  | -2.49968100 | 0.81274900  | 0.07683300  |
| H  | -3.03954600 | 0.10124100  | 0.90914100  |
| H  | -3.06546300 | 0.74357600  | -0.99602500 |
| H  | -1.07063600 | -1.60636200 | 1.25533800  |
| N  | -0.99021400 | 0.19578800  | -0.16559700 |
| H  | -0.25305100 | 0.60700200  | 0.41684500  |
| H  | -0.68765200 | 0.38498600  | -1.11863600 |
| H  | -2.36637500 | 1.94904400  | 0.47793800  |
| Cl | 2.13324800  | 0.23997900  | 0.03189200  |
| H  | 0.84098800  | -1.45995200 | -0.24159600 |

### Vibrational frequencies

|           |           |           |
|-----------|-----------|-----------|
| -348.0000 | 61.4394   | 116.4299  |
| 149.4126  | 181.0077  | 277.0422  |
| 420.5498  | 498.8491  | 662.3227  |
| 675.6495  | 754.2144  | 788.3601  |
| 836.0691  | 864.4469  | 1029.0274 |
| 1051.3582 | 1069.1918 | 1105.1261 |
| 1189.6635 | 1205.6861 | 1215.3086 |
| 1218.8669 | 1232.6868 | 1270.3106 |
| 1672.6837 | 2474.6901 | 2522.4024 |
| 2557.8330 | 2685.3677 | 2784.7720 |
| 3437.0002 | 3567.7874 | 3642.0027 |

### Complex (PC1)

#### Cartesian coordination

|   |             |             |             |
|---|-------------|-------------|-------------|
| B | -1.91819100 | 0.95659800  | -0.17765500 |
| H | -2.60606700 | 1.52062100  | 0.62925300  |
| B | -1.91727400 | -0.95707900 | -0.17739900 |
| H | -2.74864300 | -0.00065500 | -0.65254600 |
| H | -2.60466600 | -1.52157500 | 0.62957900  |
| H | -1.57711500 | 1.53124400  | -1.16953600 |

### Complex (RC2)

#### Cartesian coordination

|    |             |             |             |
|----|-------------|-------------|-------------|
| B  | 0.74454800  | 1.02047800  | 0.28470400  |
| H  | 0.67255100  | 0.95060400  | 1.47744800  |
| H  | 0.42623300  | 2.08632200  | -0.16881300 |
| B  | 2.45506300  | -1.10831600 | 0.11872500  |
| H  | 1.54621600  | -1.80329900 | -0.28436200 |
| H  | 2.56339300  | -1.12648100 | 1.32796300  |
| H  | -0.12120579 | 0.48040559  | -0.34679593 |
| N  | 2.06582600  | 0.42967000  | -0.27597800 |
| H  | 2.09794200  | 0.52238600  | -1.29067800 |
| H  | 2.82119800  | 1.02150100  | 0.06847300  |
| H  | 3.51032400  | -1.34267600 | -0.44787600 |
| Cl | -2.44098209 | -0.18500078 | -0.01919546 |
| H  | -0.30527868 | 0.02051252  | 0.30551240  |

### Vibrational frequencies

|           |           |           |
|-----------|-----------|-----------|
| 52.1755   | 107.6473  | 166.7768  |
| 253.7268  | 289.0881  | 406.7848  |
| 607.5985  | 699.2373  | 713.3319  |
| 770.1611  | 825.1427  | 843.9224  |
| 896.4329  | 1022.3009 | 1065.2322 |
| 1172.3049 | 1198.6419 | 1203.0738 |
| 1212.7605 | 1222.0020 | 1225.9752 |
| 1242.9989 | 1293.3079 | 1552.6771 |
| 1670.7268 | 2286.7338 | 2426.3517 |
| 2486.4986 | 2493.5456 | 2516.0718 |

|           |           |           |    |             |             |             |
|-----------|-----------|-----------|----|-------------|-------------|-------------|
| 2561.5643 | 3480.2855 | 3551.4375 | Cl | -1.60402800 | -0.31987700 | -0.03444200 |
|-----------|-----------|-----------|----|-------------|-------------|-------------|

**TS1-2**

**Cartesian coordination**

|    |             |             |             |
|----|-------------|-------------|-------------|
| B  | 0.74454800  | 1.02047800  | 0.28470400  |
| H  | 0.67255100  | 0.95060400  | 1.47744800  |
| H  | 0.42623300  | 2.08632200  | -0.16881300 |
| B  | 2.45506300  | -1.10831600 | 0.11872500  |
| H  | 1.54621600  | -1.80329900 | -0.28436200 |
| H  | 2.56339300  | -1.12648100 | 1.32796300  |
| H  | -0.22970000 | 0.41272500  | -0.42593400 |
| N  | 2.06582600  | 0.42967000  | -0.27597800 |
| H  | 2.09794200  | 0.52238600  | -1.29067800 |
| H  | 2.82119800  | 1.02150100  | 0.06847300  |
| H  | 3.51032400  | -1.34267600 | -0.44787600 |
| Cl | -2.56476400 | -0.19691200 | -0.03801500 |
| H  | -0.26600700 | 0.05791900  | 0.30473400  |

**Vibrational frequencies**

|           |           |           |
|-----------|-----------|-----------|
| -444.8370 | 75.2835   | 97.0214   |
| 175.8728  | 222.8265  | 286.0882  |
| 384.8228  | 604.0508  | 691.1112  |
| 733.7156  | 781.4365  | 918.8783  |
| 952.2767  | 983.4064  | 1089.0041 |
| 1145.9921 | 1184.9491 | 1205.0736 |
| 1211.4355 | 1217.7351 | 1224.9684 |
| 1239.9438 | 1405.7020 | 1634.8332 |
| 1669.2140 | 2472.9946 | 2529.8435 |
| 2563.8608 | 2629.2800 | 2702.6951 |
| 3492.0883 | 3518.8287 | 3560.7857 |

**Intermediate (IM1-2)**

**Cartesian coordination**

|   |             |             |             |
|---|-------------|-------------|-------------|
| B | -0.15077700 | 0.88554300  | 0.37932000  |
| H | 0.06780000  | 0.84324800  | 1.56179600  |
| H | -0.47650700 | 1.98194900  | -0.02957200 |
| B | 2.20175100  | -0.60494200 | 0.24095600  |
| H | 1.61921000  | -1.58398800 | 0.66429200  |
| H | 2.73374700  | 0.03839900  | 1.13026500  |
| N | 1.10248600  | 0.36629200  | -0.44730900 |
| H | 0.74319300  | -0.09609400 | -1.28245100 |
| H | 1.60132400  | 1.18610400  | -0.79055700 |
| H | 3.00744100  | -0.89875700 | -0.63848100 |

**Vibrational frequencies**

|           |           |           |
|-----------|-----------|-----------|
| 44.6975   | 189.6029  | 267.3608  |
| 315.2891  | 524.0451  | 644.5263  |
| 707.6032  | 813.9901  | 871.2733  |
| 926.5500  | 962.8205  | 1035.8088 |
| 1133.9935 | 1197.4782 | 1211.7622 |
| 1213.7695 | 1226.6814 | 1233.2508 |
| 1245.1981 | 1653.0055 | 2418.6568 |
| 2483.3307 | 2510.1710 | 2539.7445 |
| 2619.3951 | 3478.2958 | 3552.9246 |

**Intermediate (IM2-2)**

**Cartesian coordination**

|    |             |             |             |
|----|-------------|-------------|-------------|
| B  | 0.03125600  | 0.61620000  | -0.01671800 |
| H  | -0.00456500 | 1.23289700  | 1.01003600  |
| H  | -0.04238000 | 1.16952000  | -1.09041300 |
| B  | 2.77151700  | 0.05958400  | 0.02623700  |
| H  | 2.86225700  | 1.10853900  | -0.59009000 |
| H  | 3.36244900  | -0.83861500 | -0.52886500 |
| N  | 1.18610100  | -0.37113900 | -0.02201900 |
| H  | 0.99873700  | -0.99595200 | 0.77795500  |
| H  | 1.02050600  | -0.94206100 | -0.87324500 |
| H  | 3.07643700  | 0.16301800  | 1.21334500  |
| Cl | -1.97588300 | -0.09872300 | 0.01104800  |

**Vibrational frequencies**

|           |           |           |
|-----------|-----------|-----------|
| 94.1755   | 181.7379  | 200.0353  |
| 292.7802  | 525.0738  | 619.9082  |
| 756.2472  | 777.6440  | 865.0690  |
| 903.4346  | 971.0274  | 1084.2071 |
| 1108.6898 | 1197.0194 | 1208.8515 |
| 1214.5139 | 1224.9714 | 1226.6744 |
| 1237.5005 | 1666.2438 | 2425.6949 |
| 2495.1388 | 2520.3036 | 2581.3466 |
| 2637.2102 | 3486.1733 | 3557.0086 |

**TS2-2**

**Cartesian frequencies**

|    |             |             |             |
|----|-------------|-------------|-------------|
| B  | 0.62895700  | 0.93723400  | -0.00006300 |
| H  | 0.51490900  | 1.47872300  | 1.05096300  |
| H  | 0.51504500  | 1.47882000  | -1.05105800 |
| B  | 2.52290500  | -0.14615300 | 0.00011800  |
| H  | 2.45616200  | 1.10236000  | 0.00009800  |
| H  | 3.04889100  | -0.51114300 | -1.02507800 |
| N  | 0.97169300  | -0.53074400 | -0.00011300 |
| H  | 0.57982600  | -0.99042900 | 0.81554300  |
| H  | 0.58009100  | -0.99034400 | -0.81594300 |
| H  | 3.04857300  | -0.51113000 | 1.02547900  |
| Cl | -1.95909800 | -0.07629700 | 0.00003000  |

### **Vibrational frequencies**

|           |           |           |
|-----------|-----------|-----------|
| -393.8976 | 91.8889   | 152.2346  |
| 193.0446  | 281.5897  | 699.9794  |
| 738.1183  | 781.2947  | 787.3471  |
| 838.5651  | 969.9181  | 1042.1569 |
| 1073.5648 | 1101.3443 | 1139.2316 |
| 1195.8370 | 1203.7985 | 1240.2731 |
| 1275.4583 | 1669.1861 | 2285.3530 |
| 2550.6233 | 2607.6024 | 2706.7100 |
| 2814.1057 | 3559.0052 | 3627.3796 |
